# Supplementary material for: Comparison of metabolic and functional parameters using cardiac 18F-FDG-PET in early to mid-adulthood male and female mice
Source: Springer Nature journal article supplement (doi:10.1186/s13550-021-00748-z), 2021-01-19

**A**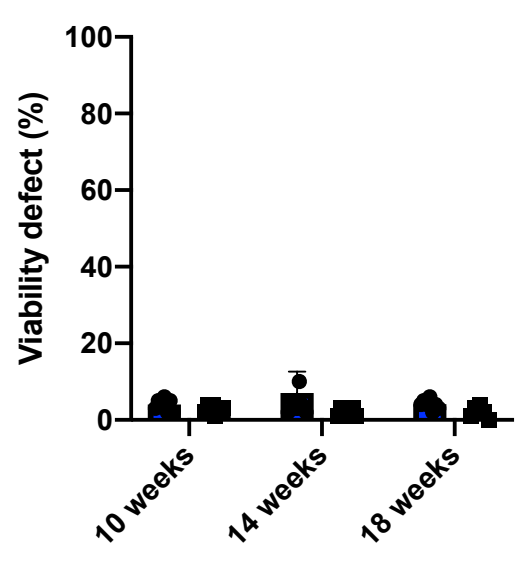**B**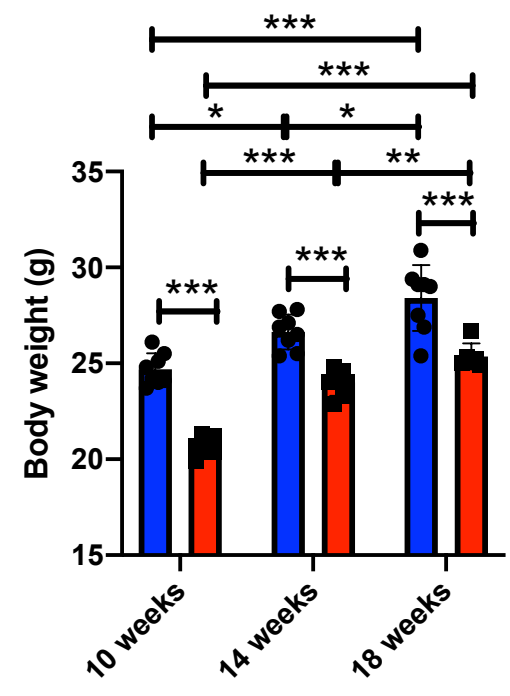**C**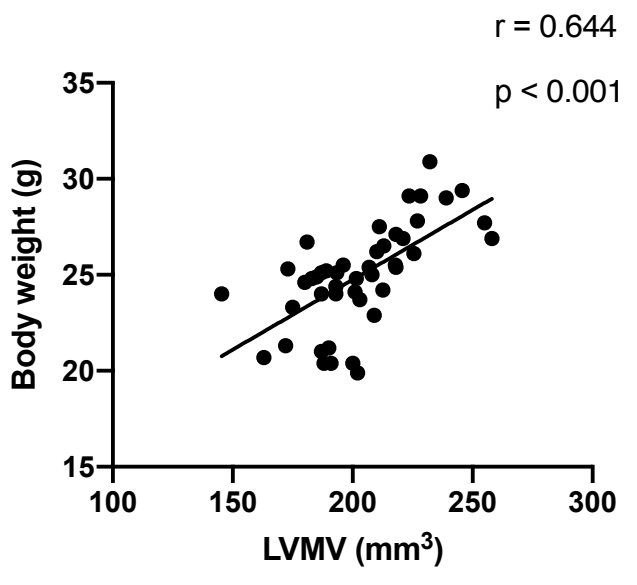**D**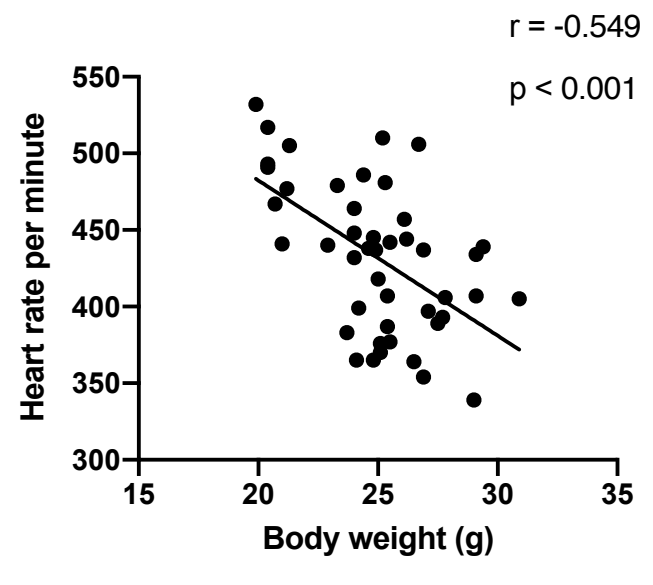

Supplement: MOESM1 [file 18780376]
